# Supplementary material for: Statistically Validated Networks in Bipartite Complex Systems
Source: PubMed Central journal article supplement (PMC3069038; doi:10.1371/journal.pone.0017994), 2011-03-31
Supplement: pone.0017994.s002.pdf [file pone.0017994.s002.pdf]

**Table S1:** Cluster over-expression analysis of production country, language, genre and filming location. Clusters are obtained by performing the Infomap partitioning of the adjacency weighted movie network (ADJ-W), FDR weighted movie network (FDR-W) and the Bonferroni weighted movie network (BONF-W). For each of the four considered classifications, we report the total number of observed over-expressions for each network. The number in parenthesis is the number of distinct clusters where at least one over-expression has been observed.

|                        | ADJ-W         | FDR-W         | BONF-W      |
|------------------------|---------------|---------------|-------------|
| movies in all clusters | 78,686        | 37,429        | 12,850      |
| number of clusters     | 3,386         | 4,982         | 2,931       |
| Production country     | 1,206 (1,115) | 1,944 (1,816) | 1,009 (960) |
| Language               | 601 (494)     | 1,429 (1,297) | 819 (729)   |
| Genre                  | 629 (445)     | 715 (533)     | 373 (281)   |
| Filming location       | 2,196 (793)   | 1,836 (1,123) | 853 (571)   |
