# Supplementary material for: Statistically Validated Networks in Bipartite Complex Systems
Source: PubMed Central journal article supplement (PMC3069038; doi:10.1371/journal.pone.0017994), 2011-03-31
Supplement: pone.0017994.s004.pdf [file pone.0017994.s004.pdf]

**Table S3 :** Over-expression of production country (C), language (L), genre (G) and filming locations (F) for two large clusters of FDR weighted network and five large clusters of Bonferroni weighted networks. Here we consider the movies that are also present in cluster 24 of the adjacency weighted movie network. In fact, the number in parenthesis indicate the number of movies in a specific FDR-W or BONF-W cluster that are also present in cluster 24 of the adjacency weighted movie network.

| cluster | FDR-W 5          | FDR-W 43     | BONF-W 10  | BONF-W 13        | BONF-W 309 | BONF-W 607 | BONF-W 806 |
|---------|------------------|--------------|------------|------------------|------------|------------|------------|
| movies  | 396 (390)        | 132 (125)    | 111 (111)  | 110 (110)        | 13 (13)    | 10 (10)    | 15 (13)    |
| C       | India 395        | India 132    | India 111  | India 110        | India 13   | India 10   | India 15   |
| L       | Telugu 375       | Tamil 120    | Telugu 111 | Telugu 109       | Telugu 12  | Telugu 9   | Tamil 14   |
| L       | Tamil 15         | Hindi 21     | -          | -                | -          | -          | -          |
| L       | -                | Telugu 21    | -          | -                | -          | -          | -          |
| G       | Action 132       | Romance 52   | Family 25  | Action 47        | -          | -          | -          |
| G       | Romance 94       | Action 48    | Musical 11 | Romance 39       | -          | -          | -          |
| G       | Family 40        | Musical 17   | -          | -                | -          | -          | -          |
| G       | Musical 24       | -            | -          | -                | -          | -          | -          |
| F       | NA 315           | NA 99        | NA 98      | NA 78            | -          | -          | -          |
| F       | Hyderabad 45     | Chennai 15   | -          | Hyderabad 13     | -          | -          | -          |
| F       | Andhra Pradesh 7 | Tamil Nadu 3 | -          | Andhra Pradesh 5 | -          | -          | -          |
| F       | Rajahmundry 4    | -            | -          | -                | -          | -          | -          |
